# Supplementary material for: PRS-on-Spark (PRSoS): a novel, efficient and flexible approach for generating polygenic risk scores
Source: PubMed Central journal article supplement (PMC6083617; doi:10.1186/s12859-018-2289-9), 2018-08-08

N = 264

N = 1320

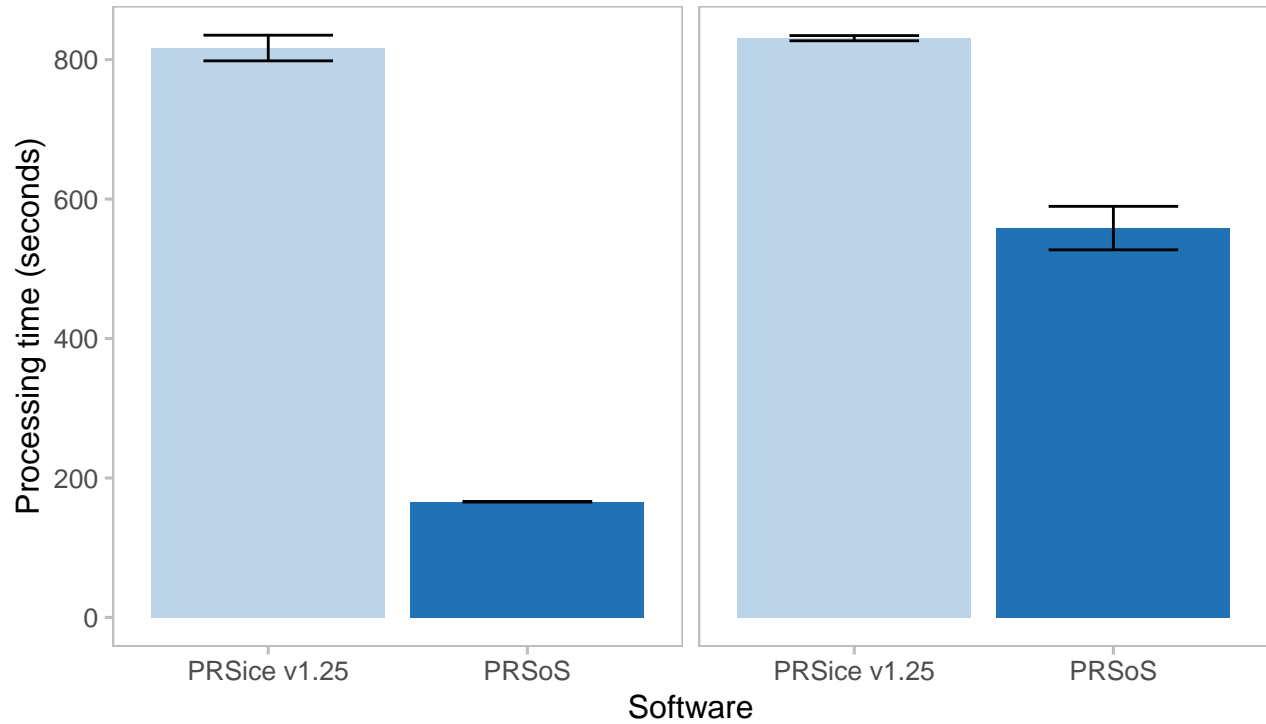

Supplement: 12859_2018_2289_MOESM4_ESM.pdf [file 12859_2018_2289_MOESM4_ESM.pdf]
